# Supplementary material for: Baitouweng Decoction Alleviates Dextran Sulfate Sodium–Induced Ulcerative Colitis Through Nrf2/HO-1 Pathway Activation and HMGB1 Downregulation
Source: Research Square preprint supplement (doi:10.21203/rs.3.rs-512623/v1), 2021-06-01
Supplement: Supplementary file 2 [file 163457b7e22e94b281eb62ab.xlsx]

## Sheet: Sheet1
b Mobile phase condition of chromatographic separation（Thermo fisher）
Time(min)	0.1%Formic acid acetonitrile(%)	0.1 %Formic acid aqueous solution(%)
0	2	98
0.5	2	98
4	98	2
9	98	2
9.3	2	98
10	2	98
