# Supplementary material for: Baitouweng Decoction Alleviates Dextran Sulfate Sodium–Induced Ulcerative Colitis Through Nrf2/HO-1 Pathway Activation and HMGB1 Downregulation
Source: Research Square preprint supplement (doi:10.21203/rs.3.rs-512623/v1), 2021-06-01
Supplement: Supplementary file 3 [file 43aa33dd302f0bdcaedb545c.xlsx]

## Sheet: Sheet1
Table 1:The components of BTW.
Crude drugs	Dry weight of crude drugs in BTW (g)	Dry weight of crude drugs in BTW (%)
Coptis chinensis Franch	9	0.214286
Phellodendron chinensis Schneid	9	0.214286
Pulsatilla chinensis (Bge.) Regel	15	0.357143
Fraxinus rhynchophylla Hance	9	0.214286
Total	42	1
